# Supplementary material
Source: publisher figshare collection journal article supplement (https://karger.figshare.com/ndownloader/files/25382684)
Supplement: Supplementary file 1 [file 25382684]

| Table S1. The complete search strategy used for Embase and PubMed. | |
| --- | --- |
| Embase |  |
| No. Query Results | Referneces |
| #32. #12 AND #21 AND #30 AND #31 | 98 |
| #31. 'clinical article'/exp OR 'controlled study'/exp | 12,790,521 |
| OR 'major clinical study'/exp OR 'prospective |  |
| study'/exp OR 'cohort analysis'/exp OR |  |
| 'cohort':ti,ab OR 'compared':ti,ab OR |  |
| 'groups':ti,ab OR 'case control':ti,ab OR |  |
| 'multivariate':ti,ab |  |
| #30. #22 OR #23 OR #24 OR #25 OR #26 OR #27 OR #28 OR #29 | 2,704,143 |
| #29. 'survival':ab,ti | 1,228,212 |
| #28. 'mortality':ab,ti | 975,987 |
| #27. 'death':ab,ti | 892,698 |
| #26. 'fatality':ab,ti | 20,642 |
| #25. 'survive*':ab,ti | 156,597 |
| #24. 'sudden death':ab,ti | 29,293 |
| #23. 'dialysis mortality':ab,ti | 128 |
| #22. 'cardiovascular mortality':ab,ti | 18,034 |
| #21. #13 OR #14 OR #15 OR #16 OR #17 OR #18 OR #19 OR #20 | 86,798 |
| #20. 'hypomagnesemia*':ab,ti | 4,023 |
| #19. 'hypermagnesemia*':ab,ti | 732 |
| #18. 'normomagnesemia*':ab,ti | 98 |
| #17. 'magnesium blood level':ab,ti | 34 |
| #16. 'total magnesium':ab,ti | 398 |
| #15. 'blood magnesium':ab,ti | 321 |
| #14. 'serum magnesium':ab,ti | 3,198 |
| #13. 'magnesium'/exp | 83,782 |
| #12. #1 OR #2 OR #3 OR #4 OR #5 OR #6 OR #7 OR #8 OR | 149,187 |
| #9 OR #10 OR #11 |  |
| #11. 'continuous arterio-venous hemodiafiltration':ab,ti | 8 |
| #10. 'continuous veno-venous hemofiltration':ab,ti | 543 |
| #9. 'hemodiafiltration':ab,ti | 3,109 |
| #8. 'haemodialfiltration':ab,ti | 23 |
| #7. 'haemofiltration':ab,ti | 1,386 |
| #6. 'hemofiltration':ab,ti | 4,521 |
| #5. 'haemodialysis':ab,ti | 19,298 |
| #4. 'renal dialysis':ab,ti | 1,580 |
| #3. 'kidney failure':ab,ti | 8,986 |
| #2. 'peritoneal dialysis'/exp | 40,314 |
| #1. 'hemodialysis'/exp | 101,903 |
| Pubmed | |
| #9(#5And#6And#7And#8). Search ((((((((((cardiovascular mortality[Title/Abstract]) OR dialysis mortality[Title/Abstract]) OR sudden death[Title/Abstract]) OR survive*[Title/Abstract]) OR survival[Title/Abstract]) OR death[Title/Abstract]) OR mortality[Title/Abstract])) AND ("cohort studies"[mesh] OR "case-control studies"[mesh] OR "comparative study"[pt] OR "risk factors"[mesh] OR "cohort"[tw] OR "compared"[tw] OR "groups"[tw] OR "case control"[tw] OR "multivariate"[tw])) AND (((((((((serum magnesium[Title/Abstract]) OR blood magnesium[Title/Abstract]) OR total magnesium[Title/Abstract])  OR magnesium blood level[Title/Abstract]) OR normomagnesemia*[Title/Abstract]) OR hypermagnesemia*[Title/Abstract]) OR hypomagnesemia*[Title/Abstract])) OR "Magnesium"[Mesh])) AND ((((((((((((Kidney failure[Title/Abstract]) OR Hemodialysis[Title/Abstract]) OR Haemodialysis[Title/Abstract]) OR Peritoneal dialysis[Title/Abstract])  OR Hemofiltration[Title/Abstract]) OR Haemofiltration[Title/Abstract]) OR Haemodialfiltration[Title/Abstract]) OR Hemodiafiltration[Title/Abstract]) OR (CVVH[Title/Abstract] OR continuous veno-venous hemofiltration[Title/Abstract])) OR (CAVH[Title/Abstract] OR continuous arterio-venous hemodiafiltration[Title/Abstract]))) OR "Renal Dialysis"[Mesh]) Sort by: [pubsolr12] | 137 |
| #8(#3or#4). Search (((((((((((Kidney failure[Title/Abstract]) OR Hemodialysis[Title/Abstract]) OR Haemodialysis[Title/Abstract])  OR Peritoneal dialysis[Title/Abstract]) OR Hemofiltration[Title/Abstract]) OR Haemofiltration[Title/Abstract]) OR Haemodialfiltration[Title/Abstract]) OR Hemodiafiltration[Title/Abstract]) OR (CVVH[Title/Abstract] OR continuous veno-venous hemofiltration[Title/Abstract])) OR (CAVH[Title/Abstract] OR continuous arterio-venous hemodiafiltration[Title/Abstract]))) OR "Renal Dialysis"[Mesh] Sort by: [pubsolr12] | 138344 |
| #7(#1or#2). Search ((((((((serum magnesium[Title/Abstract]) OR blood magnesium[Title/Abstract]) OR total magnesium[Title/Abstract])  OR magnesium blood level[Title/Abstract]) OR normomagnesemia*[Title/Abstract]) OR hypermagnesemia*[Title/Abstract]) OR hypomagnesemia*[Title/Abstract])) OR "Magnesium"[Mesh] Sort by: [pubsolr12] | 68564 |
| #6. Search "cohort studies"[mesh] OR "case-control studies"[mesh] OR "comparative study"[pt] OR "risk factors"[mesh] OR "cohort"[tw]  OR "compared"[tw] OR "groups"[tw] OR "case control"[tw] OR "multivariate"[tw] Sort by: [pubsolr12] | 8051647 |
| #5. Search ((((((cardiovascular mortality[Title/Abstract]) OR dialysis mortality[Title/Abstract]) OR sudden death[Title/Abstract])  OR survive*[Title/Abstract]) OR survival[Title/Abstract]) OR death[Title/Abstract]) OR mortality[Title/Abstract] Sort by: [pubsolr12] | 1990362 |
| #4. Search (((((((((Kidney failure[Title/Abstract]) OR Hemodialysis[Title/Abstract]) OR Haemodialysis[Title/Abstract])  OR Peritoneal dialysis[Title/Abstract]) OR Hemofiltration[Title/Abstract]) OR Haemofiltration[Title/Abstract]) OR Haemodialfiltration[Title/Abstract]) OR Hemodiafiltration[Title/Abstract]) OR (CVVH[Title/Abstract] OR continuous veno-venous hemofiltration[Title/Abstract])) OR (CAVH[Title/Abstract] OR continuous arterio-venous hemodiafiltration[Title/Abstract]) Sort by: [pubsolr12] | 99398 |
| #3. Search "Renal Dialysis"[Mesh] Sort by: [pubsolr12] | 108298 |
| #2. Search ((((((serum magnesium[Title/Abstract]) OR blood magnesium[Title/Abstract]) OR total magnesium[Title/Abstract]) OR magnesium blood level[Title/Abstract]) OR normomagnesemia*[Title/Abstract]) OR hypermagnesemia*[Title/Abstract]) OR hypomagnesemia*[Title/Abstract] Sort by: [pubsolr12] | 6194 |
| #1. Search "Magnesium"[Mesh] Sort by: [pubsolr12] | 65879 |

| **Table S2. Quality assessment of included studies using the Newcastle-Ottawa Scale (NOS)** | | | | | | | | | |
| --- | --- | --- | --- | --- | --- | --- | --- | --- | --- |
| Study | Selection | | | | Comparability | Outcome | | | Total score |
| Representativeness of the exposed cohort# | Selection of the non-exposed cohort | Ascertainment of exposure | Demonstration that outcome of interest was not present at start of study$ | Comparability of cohorts on the basis of the design or analysis& | Assessment of outcome | Follow-up long enough for outcomes to occur## | Adequacy of follow up$$ |
| Ishimura E [20] | * | * | * | - | * | * | * | * | 7 |
| Tamura T [21] | * | * | * | * | * | * | * | * | 8 |
| Markaki A [22] | - | * | * | * | ** | * | * | * | 8 |
| Matias P [23] | * | * | * | * | * | * | * | * | 8 |
| Ago R [24] | * | * | * | - | * | * | - | * | 6 |
| Lacson E Jr [25] | * | * | * | - | ** | * | - | * | 7 |
| Li L [26] | * | * | * | - | * | * | * | * | 7 |
| Shimohata H [27] | * | * | * | - | ** | * | * | * | 8 |
| Lu C [28] | * | * | * | - | * | * | - | * | 6 |
| Kurita N [29] | * | * | * | * | ** | * | - | * | 8 |
| Selim GN [30] | - | * | * | * | ** | * | * | * | 8 |
| Wu L [31] | - | * | * | - | * | * | * | * | 6 |
| Mizuiri S [31] | - | * | * | * | ** | * | - | * | 7 |

Note: Each star represents one score. In the current study, we considered a study with seven or more scores as a high-quality study. Studies with five to seven scores are considered of moderate-quality; studies with four or fewer scores are of low-quality.

#Studies with a star are either multicenter, or with larger study sample (larger than median study sample of included studies), or included all patients in one center

$ Studies with a star exclude patients with severe disease that could obviously affect their survival time

& Studies adjusted for basic confounders, e.g. age are given one star

Studies adjusted for main common confounders, PTH and active vitamin D are given two stars

## Studies with a follow-up period longer than three years are given one star.

$$ Studies with no loss to follow-up, with a follow-up rate higher than 90%, or described the characters of patients loss to follow-up are given one star.

| **Table S3. Subgroup analysis for the meta-analysis on the association between serumMg level and all-cause mortality** | | | | | | | | |
| --- | --- | --- | --- | --- | --- | --- | --- | --- |
| Pre-specified subgroups | | | | No. of studies | P value | Adjusted HR (95%CI) | I2 (%) | Heterogeneity between groups  (P value) |
| Methodological method for generating HR | | | | | |  |  |  |
|  | HR generated from log transformed data | | | 11 | < 0.001 | 1.19 (1.14, 1.25) | 82.6 | 0.85 |
|  | Additional data derived from Kaplan-Meier curves | | | 2 | 0.247 | 1.17 (0.93, 1.46) | 25.3 |
| Sample size | | | |  |  |  |  |  |
|  | Small trails | | | 9 | < 0.001 | 1.19 (1.13, 1.26) | 85.3 | 0.89 |
|  | Large trails# | | | 4 | 0.211 | 1.20 (1.09, 1.31) | 33.5 |
| Follow-up duration | | | |  |  |  |  |  |
|  | Longer follow-up duration$ | | | 8 | < 0.001 | 1.17 (1.12, 1.23) | 81.6 | 0.046 |
|  | Shorter follow-up duration | | | 5 | 0.002 | 1.39 (1.19, 1.62) | 76.3 |
| Study type | | | |  |  |  |  |  |
|  | | | Retrospective studies | 7 | < 0.001 | 1.27 (1.16, 1.39) | 87.6 | 0.119 |
|  | | | Prospective studies | 6 | 0.148 | 1.17 (1.10, 1.23) | 38.6 |
| Mean age of the study population | | | |  |  |  |  |  |
|  | Elder population& | | | 4 | 0.757 | 2.18 (1.47, 3.24) | 0 | 0.003 |
|  | Younger population | | | 9 | <0.001 | 1.18 (1.13, 1.24) | 83.5 |
| Region |  | | |  |  |  |  |  |
|  | Asia | | | 8 | < 0.001 | 1.67 (1.42,1.97) | 82.6 | < 0.001 |
|  | Europe | | | 3 | 1 | 1.12 (0.94, 1.22) | 0 |
|  | Multiple countries | | | 2 | 0.55 | 1.18 (1.06, 1.31) | 0 |
| Dialysis duration | | | |  |  |  |  |  |
|  | | Longer dialysis duration* | | 8 | < 0.001 | 1.30 (1.18, 1.43) | 84.6 | 0.052 |
|  | | Shorter dialysis duration | | 5 | 0.04 | 1.16 (1.10, 1.23) | 59.1 |

Abbreviations: HR, hazard ratio; CI, confidence interval; HD, hemodialysis; PD, peritoneal dialysis;

#Studies with a sample size larger than the median study sample size of included studies (N=500)

$ Studies with a follow-up duration longer than the median follow-up duration (three years) of included studies

& The average of the mean age in each included studies (65y) is used as a cut-off. Studies with an elder population refer to studies with a mean age of study population elder than 65y.

* Studies with a dialysis duration longer than three years.
